# Supplementary material
Source: PubMed Central journal article supplement (PMC9253034)

# Uncropped blots for Figure 1C

cleaved IL-1 $\beta$

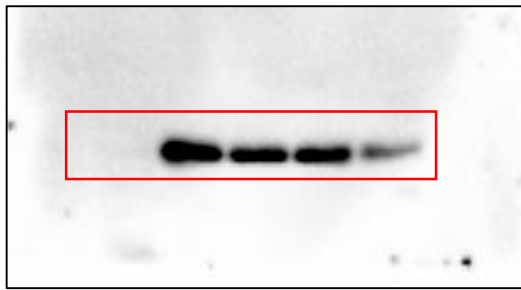

NLRP3

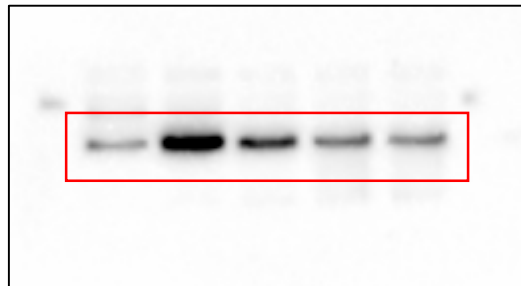

pro-IL-1 $\beta$

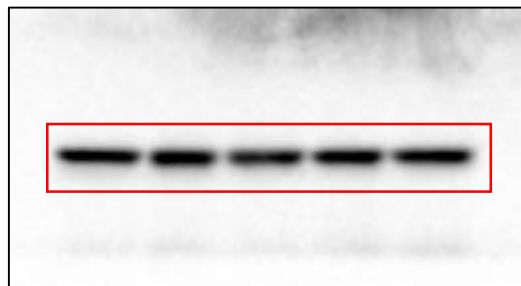

# Uncropped blots for Figure 1C

cleaved caspase 1

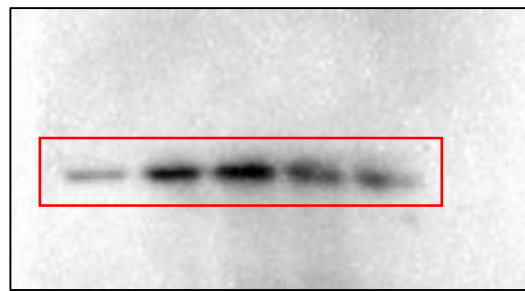

pro-caspase 1

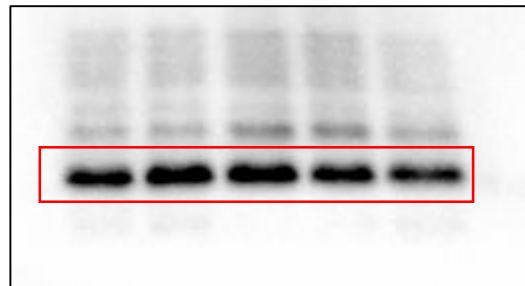

GAPDH

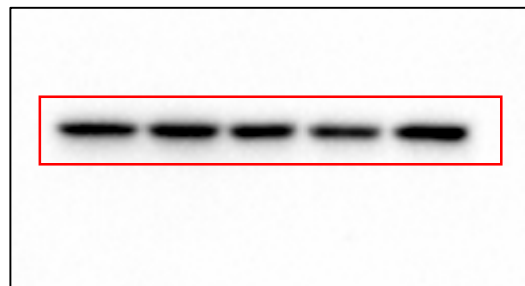

# Uncropped blots for Figure 2A

Ac-lysine

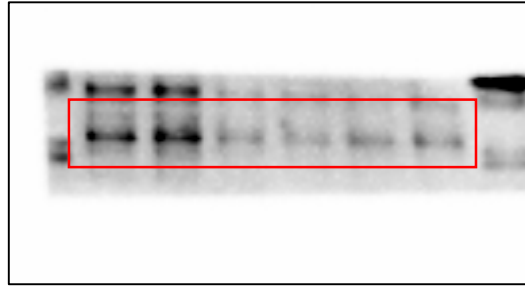

NLRP3

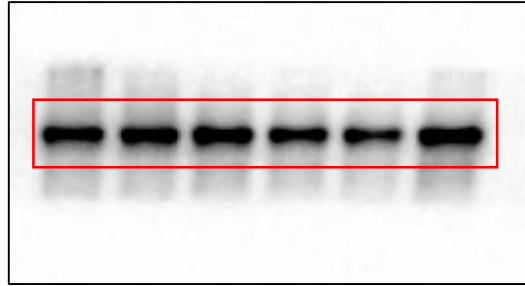

# Uncropped blots for Figure 2B

SIRT1

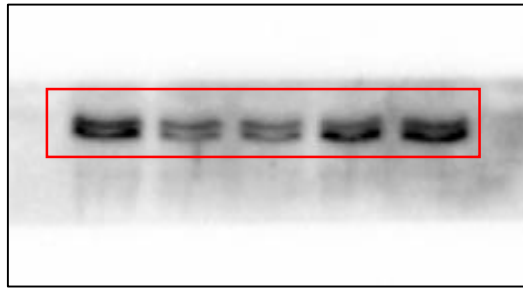

GAPDH

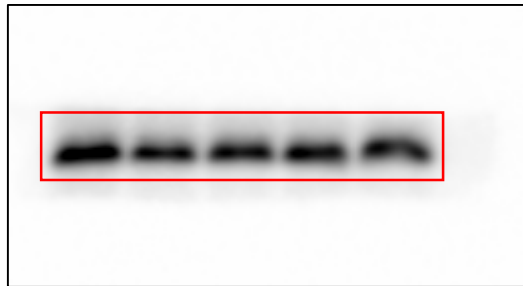

# Uncropped blots for Figure 2c

ctrl

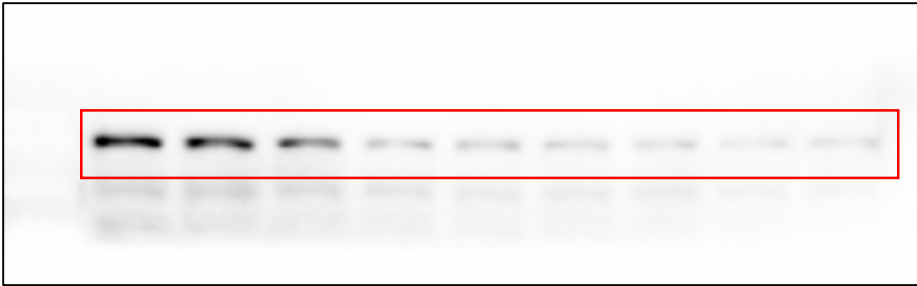

SIRT1

AC

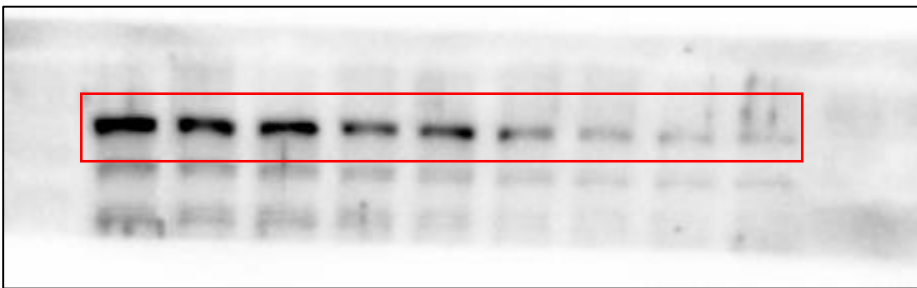

SIRT1

# Uncropped blots for Figure 2E

Ac-lysine

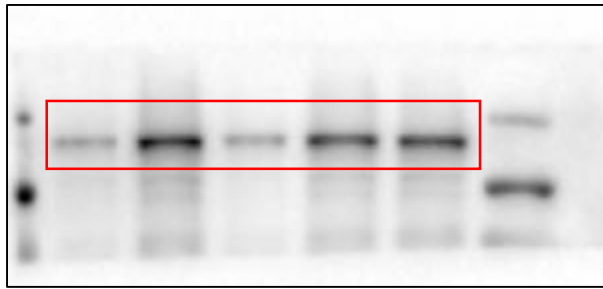

NLRP3

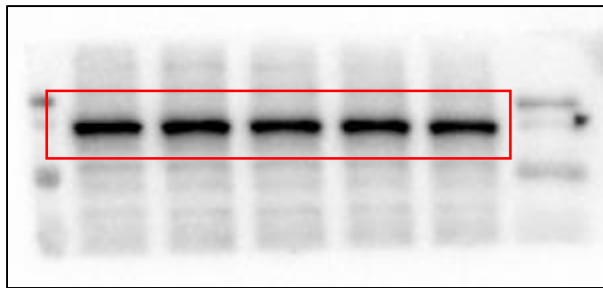

# Uncropped blots for Figure 2F

cleaved IL-1 $\beta$

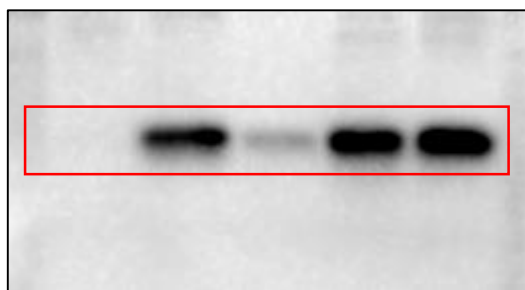

NLRP3

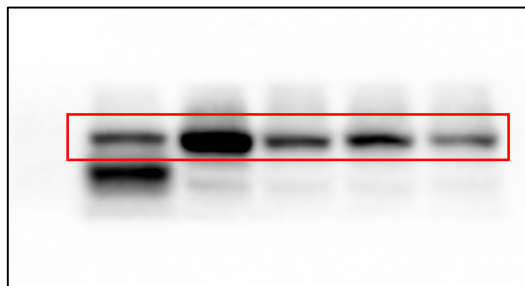

pro-IL-1 $\beta$

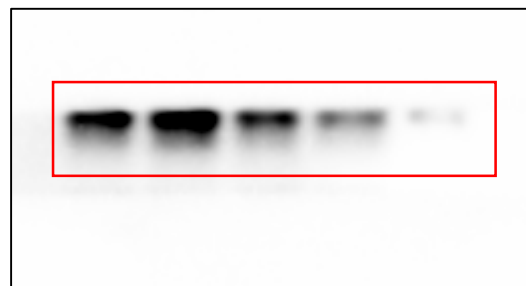

# Uncropped blots for Figure 2F

cleaved caspase 1

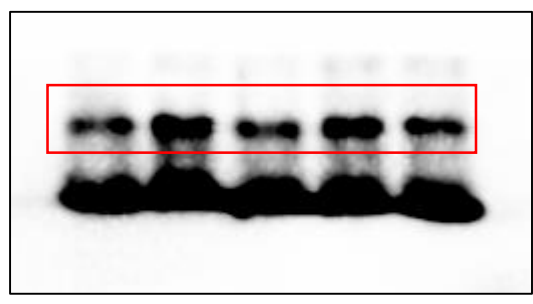

pro-caspase 1

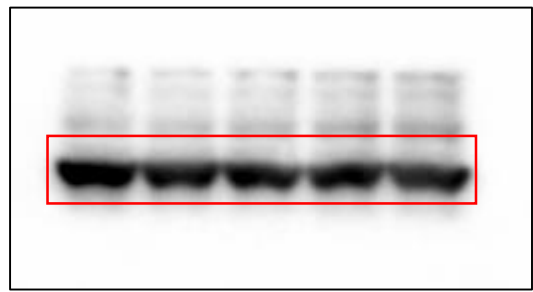

GAPDH

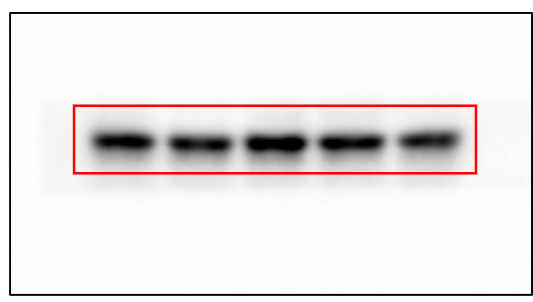



# Uncropped blots for Figure 6G

NLRP3

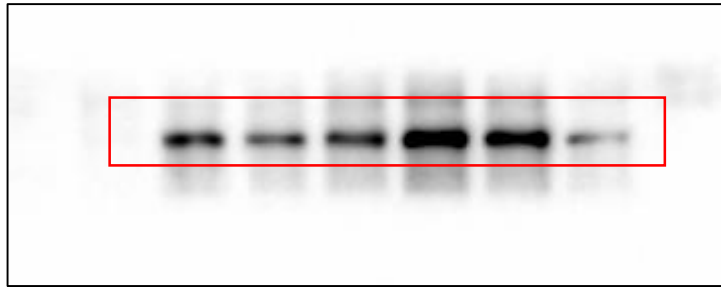

cleaved caspase1

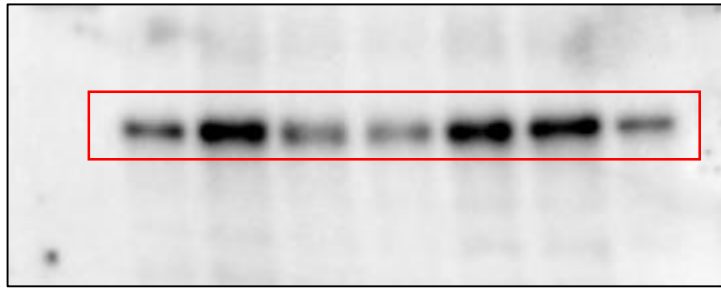

cleaved IL-1 $\beta$

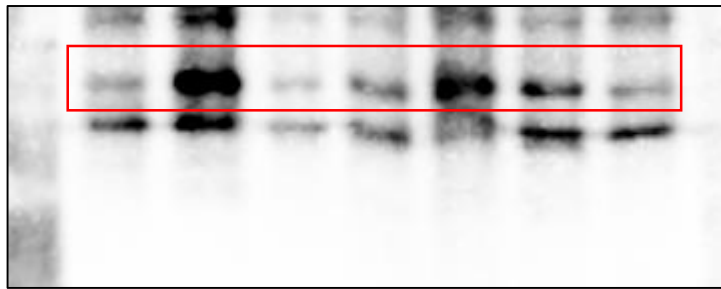

GAPDH

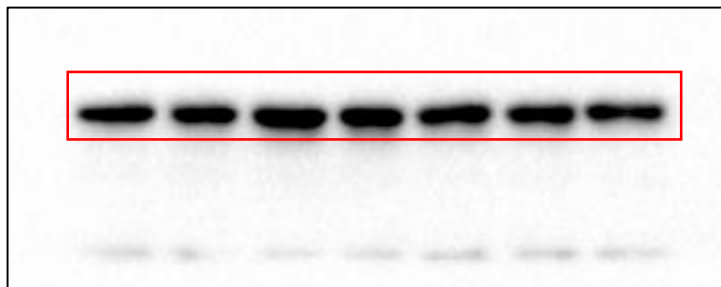

# Uncropped blots for Figure 7C

F4/80

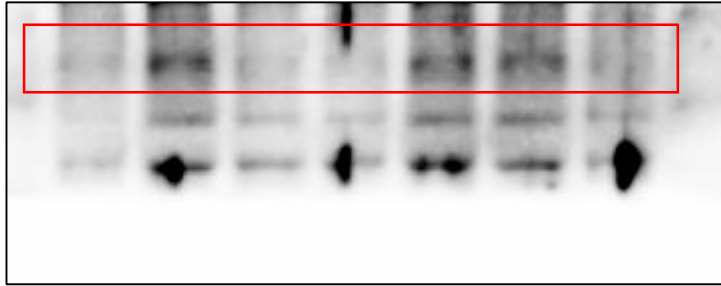

CD68

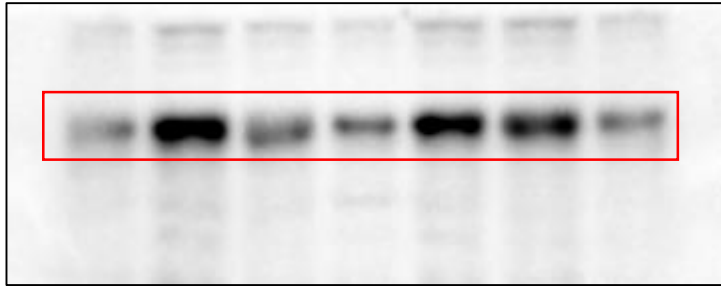

GAPDH

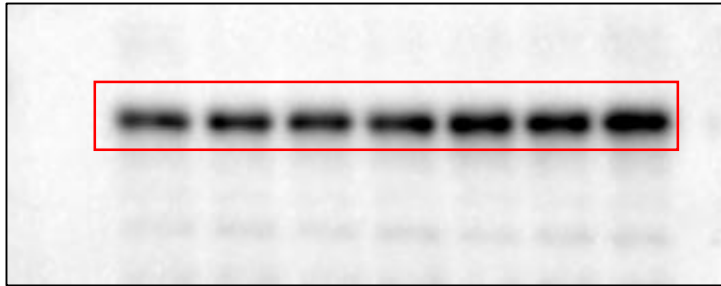

Supplement: 41401_2021_797_MOESM2_ESM.pdf [file 41401_2021_797_MOESM2_ESM.pdf]
